# Supplementary material
Source: publisher figshare collection journal article supplement (https://tandf.figshare.com/ndownloader/files/17435495)
Supplement: Supplementary file 1 [file 17435495]

| **id** | **site** | **address** |  |  | **city** | **state** | **latitude** | **longitude** | **Max Depth Sampled (m)** |
| --- | --- | --- | --- | --- | --- | --- | --- | --- | --- |
| BFM | Brewer South Freeport | 31 Main St. |  |  | South Freeport | ME | 43.82088 | -70.1058 | 0.30 |
| HCM | Hawthorne Cove Marina | 10 White Street |  |  | Salem | MA | 42.5213 | -70.8818 | 0.30 |
| MMA | Mass Martime Academy | 101 Academy Drive |  |  | Bourne | MA | 41.73855 | -70.6262 | 4.60 |
| PHM | Port Harbor Marine | 1 Spring Point Drive |  |  | Portland | ME | 43.64931 | -70.2312 | 4.05 |
| POP | Popes Island Marina | 102 Pope's Island -Rt 6 |  |  | New Bedford | MA | 41.6398 | -70.9133 | 0.30 |
| ROW | Rowes Wharf | 30 Rowes Wharf |  |  | Boston | MA | 42.3574 | -71.0489 | 5.60 |
| SWM | Sandwich Marina | 25 Ed Moffitt Drive (P.O. Box 1393) |  |  | Sandwich | MA | 41.771 | -70.5023 | 4.20 |
| UNH | UNH Marine Dock | 29 Wentworth Rd |  |  | Newcastle | NH | 43.07156 | -70.7125 | 4.00 |

Table S1. Sampling localities including GPS co-ordinates and collection dates for the 2018 Rapid Assessment Survey of New England harbors.
